# Supplementary material for: The Somatic Mutational Landscape of Mismatch Repair Deficient Prostate Cancer
Source: MDPI journal article supplement (doi:10.3390/jcm12020623), 2023-01-12
Supplement: s1 [file s1]

**Supplementary Table S2.** List of MMR-d primary tumors

| Patient ID          | Sample ID                   | Gene        | Alteration Type | Alteration Description |
|---------------------|-----------------------------|-------------|-----------------|------------------------|
| TCGA-EJ-7782        | TCGA-EJ-7782-01             | <i>MSH2</i> | SNV             | N538Kfs*3              |
| TCGA-EJ-A65B        | TCGA-EJ-A65B-01             | <i>MLH1</i> | SNV             | R18C                   |
| TCGA-XK-AAIW        | TCGA-XK-AAIW-01             | <i>MSH6</i> | SNV             | F582Lfs*4              |
| TCGA-XK-AAIW        | TCGA-XK-AAIW-01             | <i>PMS2</i> | SNV             | R107Q                  |
| GENIE-MSK-P-0004387 | GENIE-MSK-P-0004387-T03-IM6 | <i>MSH6</i> | SNV             | Y556H                  |
| GENIE-MSK-P-0004946 | GENIE-MSK-P-0004946-T01-IM5 | <i>PMS2</i> | SNV             | R287*                  |
| GENIE-DFCI-004303   | GENIE-DFCI-004303-3443      | <i>PMS2</i> | SNV             | N335S                  |
| GENIE-DFCI-004161   | GENIE-DFCI-004161-4096      | <i>MSH6</i> | SNV             | I1227V                 |
| GENIE-MSK-P-0015570 | GENIE-MSK-P-0015570-T01-IM6 | <i>MLH1</i> | SNV             | C124*                  |
| GENIE-MSK-P-0015837 | GENIE-MSK-P-0015837-T01-IM6 | <i>MLH1</i> | SNV             | D63G                   |
| GENIE-MSK-P-0008387 | GENIE-MSK-P-0008387-T01-IM5 | <i>MSH6</i> | SNV             | F1088Lfs*5             |
| GENIE-MSK-P-0009892 | GENIE-MSK-P-0009892-T01-IM5 | <i>MSH6</i> | SNV             | G93Efs*56              |
| GENIE-MSK-P-0009892 | GENIE-MSK-P-0009892-T01-IM5 | <i>PMS2</i> | SNV             | R199H                  |
| GENIE-DFCI-002078   | GENIE-DFCI-002078-10200     | <i>PMS2</i> | SNV             | D414Tfs*34             |
| GENIE-DFCI-009654   | GENIE-DFCI-009654-8308      | <i>MSH2</i> | SNV             | A2T                    |
| GENIE-DFCI-011099   | GENIE-DFCI-011099-11350     | <i>PMS2</i> | SNV             | R646M                  |
| GENIE-DFCI-051036   | GENIE-DFCI-051036-203414    | <i>MSH2</i> | SNV             | A714Lfs*6              |
| GENIE-DFCI-039653   | GENIE-DFCI-039653-233142    | <i>MSH6</i> | SNV             | X1267_splice           |
| GENIE-DFCI-028582   | GENIE-DFCI-028582-158650    | <i>MLH1</i> | SNV             | D631Y                  |
| GENIE-DFCI-090897   | GENIE-DFCI-090897-350665    | <i>MLH1</i> | SNV             | S677Tfs*107            |
| GENIE-MSK-P-0021894 | GENIE-MSK-P-0021894-T01-IM6 | <i>MSH2</i> | SNV             | E786Dfs*11             |
| GENIE-MSK-P-0022120 | GENIE-MSK-P-0022120-T01-IM6 | <i>MSH2</i> | SNV             | C693R                  |
| GENIE-MSK-P-0022120 | GENIE-MSK-P-0022120-T01-IM6 | <i>MSH6</i> | SNV             | F1088Lfs*5             |
| GENIE-MSK-P-0023307 | GENIE-MSK-P-0023307-T01-IM6 | <i>MSH6</i> | SNV             | F1088Lfs*5             |
| GENIE-MSK-P-0023405 | GENIE-MSK-P-0023405-T01-IM6 | <i>MSH2</i> | SNV             | Q402*                  |
| GENIE-MSK-P-0023405 | GENIE-MSK-P-0023405-T01-IM6 | <i>MSH2</i> | SNV             | L595P                  |
| GENIE-MSK-P-0026871 | GENIE-MSK-P-0026871-T01-IM6 | <i>MSH6</i> | SNV             | L473V                  |
| GENIE-MSK-P-0027380 | GENIE-MSK-P-0027380-T01-IM6 | <i>MSH2</i> | SNV             | X71_splice             |
| GENIE-MSK-P-0028654 | GENIE-MSK-P-0028654-T01-IM6 | <i>PMS2</i> | SNV             | F272C                  |
| GENIE-MSK-P-0029127 | GENIE-MSK-P-0029127-T01-IM6 | <i>MSH6</i> | SNV             | K149Nfs*25             |
| GENIE-MSK-P-0029164 | GENIE-MSK-P-0029164-T01-IM6 | <i>MSH2</i> | SNV             | K471Nfs*11             |
| GENIE-MSK-P-0030465 | GENIE-MSK-P-0030465-T01-IM6 | <i>MSH2</i> | SNV             | X879_splice            |
| GENIE-DFCI-123573   | GENIE-DFCI-123573-1149676   | <i>MSH6</i> | SNV             | F1088Lfs*5             |
| GENIE-DFCI-106275   | GENIE-DFCI-106275-804214    | <i>PMS2</i> | SNV             | S46I                   |
| GENIE-MSK-P-0032288 | GENIE-MSK-P-0032288-T01-IM6 | <i>PMS2</i> | SNV             | Y268Tfs*39             |
| GENIE-MSK-P-0032701 | GENIE-MSK-P-0032701-T01-IM6 | <i>MSH2</i> | SNV             | V3Dfs*74               |
| GENIE-MSK-P-0033077 | GENIE-MSK-P-0033077-T01-IM6 | <i>MSH6</i> | SNV             | G1299D                 |
| GENIE-MSK-P-0034070 | GENIE-MSK-P-0034070-T01-IM6 | <i>MSH2</i> | SNV             | R524C                  |
| GENIE-MSK-P-0034070 | GENIE-MSK-P-0034070-T01-IM6 | <i>MSH6</i> | SNV             | F1088Sfs*2             |
| GENIE-MSK-P-0035133 | GENIE-MSK-P-0035133-T01-IM6 | <i>MSH6</i> | SNV             | F1088Sfs*2             |

|                     |                             |                   |     |                          |
|---------------------|-----------------------------|-------------------|-----|--------------------------|
| GENIE-MSK-P-0035133 | GENIE-MSK-P-0035133-T01-IM6 | <i>PMS2</i>       | SNV | E656*                    |
| GENIE-MSK-P-0035426 | GENIE-MSK-P-0035426-T01-IM6 | <i>MSH6</i>       | SNV | S1251*                   |
| GENIE-MSK-P-0035426 | GENIE-MSK-P-0035426-T01-IM6 | <i>MSH6</i>       | SNV | R1334W                   |
| GENIE-MSK-P-0035426 | GENIE-MSK-P-0035426-T01-IM6 | <i>PMS2</i>       | SNV | R665I                    |
| GENIE-MSK-P-0036805 | GENIE-MSK-P-0036805-T01-IM6 | <i>MSH6</i>       | SNV | F1088Sfs*2               |
| GENIE-MSK-P-0040259 | GENIE-MSK-P-0040259-T01-IM6 | <i>MSH2</i>       | SNV | R621*                    |
| GENIE-MSK-P-0041356 | GENIE-MSK-P-0041356-T01-IM6 | <i>MSH2</i>       | SNV | X123_splice              |
| GENIE-MSK-P-0043317 | GENIE-MSK-P-0043317-T01-IM6 | <i>PMS2</i>       | SNV | R287Sfs*19               |
| GENIE-MSK-P-0043520 | GENIE-MSK-P-0043520-T01-IM6 | <i>MSH2</i>       | SNV | Q97*                     |
| GENIE-VICC-155853   | GENIE-VICC-155853-unk-1     | <i>MSH2</i>       | SNV | R680P                    |
| GENIE-DFCI-261954   | GENIE-DFCI-261954-3646368   | <i>MSH2</i>       | SNV | E318*                    |
| GENIE-DFCI-268567   | GENIE-DFCI-268567-3733748   | <i>MSH2</i>       | SNV | Q574P                    |
| GENIE-MSK-P-0054354 | GENIE-MSK-P-0054354-T01-IM6 | <i>MSH2</i>       | SNV | D660Ifs*25               |
| GENIE-MSK-P-0052998 | GENIE-MSK-P-0052998-T01-IM6 | <i>PMS2</i>       | SNV | P654T                    |
| GENIE-MSK-P-0055256 | GENIE-MSK-P-0055256-T01-IM6 | <i>MLH1</i>       | SNV | G54V                     |
| GENIE-UCSF-12162    | GENIE-UCSF-12162-2479T      | <i>MSH6</i>       | SNV | X1334_splice             |
| GENIE-MSK-P-0059427 | GENIE-MSK-P-0059427-T01-IM7 | <i>MSH2</i>       | SNV | F178Sfs*36               |
| GENIE-MSK-P-0059427 | GENIE-MSK-P-0059427-T01-IM7 | <i>MSH6</i>       | SNV | R361H                    |
| GENIE-MSK-P-0061209 | GENIE-MSK-P-0061209-T01-IM7 | <i>PMS2</i>       | SNV | R107W                    |
| GENIE-MSK-P-0062920 | GENIE-MSK-P-0062920-T01-IM7 | <i>MSH6</i>       | SNV | H1266Y                   |
| GENIE-MSK-P-0064623 | GENIE-MSK-P-0064623-T01-IM7 | <i>MSH6</i>       | SNV | Q698*                    |
| GENIE-MSK-P-0061685 | GENIE-MSK-P-0061685-T01-IM7 | <i>MLH1</i>       | SNV | S446Lfs*32               |
| GENIE-MSK-P-0061685 | GENIE-MSK-P-0061685-T01-IM7 | <i>MSH2</i>       | SNV | A230Lfs*16               |
| GENIE-MSK-P-0067365 | GENIE-MSK-P-0067365-T01-IM7 | <i>MSH2</i>       | SNV | G820Vfs*21               |
| GENIE-MSK-P-0062736 | GENIE-MSK-P-0062736-T01-IM7 | <i>MSH2</i>       | SNV | T441Nfs*2                |
| TCGA-KK-A7B1        | TCGA-KK-A7B1-01             | <i>MLH1</i>       | CNV | Homozygous deletion      |
| TCGA-KK-A7AY        | TCGA-KK-A7AY-01             | <i>PMS2</i>       | CNV | Homozygous deletion      |
| TCGA-V1-A8X3        | TCGA-V1-A8X3-01             | <i>PMS2</i>       | CNV | Homozygous deletion      |
| GENIE-MSK-P-0029164 | GENIE-MSK-P-0029164-T01-IM6 | <i>MSH2, MSH6</i> | CNV | Homozygous deletion      |
| GENIE-MSK-P-0029323 | GENIE-MSK-P-0029323-T01-IM6 | <i>MSH2, MSH6</i> | CNV | Homozygous deletion      |
| GENIE-MSK-P-0030013 | GENIE-MSK-P-0030013-T01-IM6 | <i>MSH2, MSH6</i> | CNV | Homozygous deletion      |
| GENIE-MSK-P-0031855 | GENIE-MSK-P-0031855-T01-IM6 | <i>MSH2, MSH6</i> | CNV | Homozygous deletion      |
| GENIE-MSK-P-0035133 | GENIE-MSK-P-0035133-T01-IM6 | <i>MSH2</i>       | CNV | Homozygous deletion      |
| GENIE-MSK-P-0036805 | GENIE-MSK-P-0036805-T01-IM6 | <i>MSH2</i>       | CNV | Homozygous deletion      |
| GENIE-MSK-P-0039351 | GENIE-MSK-P-0039351-T01-IM6 | <i>MSH2, MSH6</i> | CNV | Homozygous deletion      |
| GENIE-DFCI-169310   | GENIE-DFCI-169310-2271502   | <i>MSH2, MSH6</i> | CNV | Homozygous deletion      |
| GENIE-MSK-P-0060405 | GENIE-MSK-P-0060405-T01-IM7 | <i>MSH2, MSH6</i> | CNV | Homozygous deletion      |
| GENIE-MSK-P-0061209 | GENIE-MSK-P-0061209-T01-IM7 | <i>MSH6</i>       | CNV | Homozygous deletion      |
| GENIE-MSK-P-0062382 | GENIE-MSK-P-0062382-T01-IM7 | <i>MLH1</i>       | SV  | <i>MLH1</i> -intragenic  |
| TCGA-KK-A5A1        | TCGA-KK-A5A1-01             | <i>MLH1</i>       | SV  | <i>MYRIP-MLH1</i> fusion |
| GENIE-MSK-P-0033077 | GENIE-MSK-P-0033077-T01-IM6 | <i>MSH2</i>       | SV  | <i>MSH2</i> -intragenic  |
| GENIE-DFCI-195852   | GENIE-DFCI-195852-2644796   | <i>MSH2</i>       | SV  | <i>MSH2</i> -intragenic  |
| GENIE-MSK-P-0024219 | GENIE-MSK-P-0024219-T01-IM6 | <i>MSH6</i>       | SV  | <i>MSH6-TTC7A</i> fusion |

|                     |                             |             |    |                          |
|---------------------|-----------------------------|-------------|----|--------------------------|
| GENIE-MSK-P-0024219 | GENIE-MSK-P-0024219-T01-IM6 | <i>MSH6</i> | SV | <i>MSH6-TTC7A</i> fusion |
| GENIE-DFCI-112246   | GENIE-DFCI-112246-526378    | <i>MSH6</i> | SV | <i>MSH6</i> -intragenic  |

**Supplementary Table S3.** List of MMR-d metastatic tumors

| Patient ID          | Sample ID                   | Gene        | Alteration Type | Alteration Description |
|---------------------|-----------------------------|-------------|-----------------|------------------------|
| GENIE-MSK-P-0000755 | GENIE-MSK-P-0000755-T01-IM3 | <i>MLH1</i> | SNV             | R497Gfs*11             |
| GENIE-MSK-P-0000755 | GENIE-MSK-P-0000755-T01-IM3 | <i>MSH2</i> | SNV             | R621*                  |
| GENIE-MSK-P-0001230 | GENIE-MSK-P-0001230-T01-IM3 | <i>MLH1</i> | SNV             | T148I                  |
| GENIE-MSK-P-0003665 | GENIE-MSK-P-0003665-T01-IM5 | <i>MSH2</i> | SNV             | E48*                   |
| GENIE-MSK-P-0003665 | GENIE-MSK-P-0003665-T01-IM5 | <i>MSH6</i> | SNV             | R361C                  |
| GENIE-MSK-P-0004910 | GENIE-MSK-P-0004910-T01-IM5 | <i>MSH2</i> | SNV             | P591Q                  |
| GENIE-MSK-P-0004910 | GENIE-MSK-P-0004910-T01-IM5 | <i>MSH6</i> | SNV             | F1104Lfs*11            |
| GENIE-MSK-P-0005111 | GENIE-MSK-P-0005111-T01-IM5 | <i>PMS2</i> | SNV             | Q275*                  |
| GENIE-DFCI-004876   | GENIE-DFCI-004876-3827      | <i>MSH2</i> | SNV             | E562Q                  |
| GENIE-MSK-P-0012928 | GENIE-MSK-P-0012928-T01-IM5 | <i>PMS2</i> | SNV             | Y268Tfs*39             |
| GENIE-MSK-P-0015211 | GENIE-MSK-P-0015211-T01-IM6 | <i>MSH6</i> | SNV             | F1104Lfs*11            |
| GENIE-MSK-P-0008667 | GENIE-MSK-P-0008667-T03-IM6 | <i>MSH6</i> | SNV             | F1088Lfs*5             |
| GENIE-DFCI-011525   | GENIE-DFCI-011525-11235     | <i>MLH1</i> | SNV             | X633_splice            |
| GENIE-MSK-P-0017886 | GENIE-MSK-P-0017886-T01-IM6 | <i>MSH6</i> | SNV             | I972Lfs*25             |
| GENIE-MSK-P-0019937 | GENIE-MSK-P-0019937-T01-IM6 | <i>PMS2</i> | SNV             | E582Rfs*8              |
| GENIE-DFCI-077379   | GENIE-DFCI-077379-299104    | <i>PMS2</i> | SNV             | S416C                  |
| GENIE-DFCI-037461   | GENIE-DFCI-037461-130296    | <i>MSH2</i> | SNV             | E177*                  |
| GENIE-DFCI-037461   | GENIE-DFCI-037461-130296    | <i>MSH6</i> | SNV             | R577H                  |
| GENIE-VICC-184903   | GENIE-VICC-184903-unk-1     | <i>MSH6</i> | SNV             | S1340Tfs*7             |
| GENIE-DFCI-096154   | GENIE-DFCI-096154-663890    | <i>PMS2</i> | SNV             | F686C                  |
| GENIE-DFCI-098561   | GENIE-DFCI-098561-571476    | <i>MSH6</i> | SNV             | T1225M                 |
| GENIE-DFCI-103001   | GENIE-DFCI-103001-664168    | <i>MLH1</i> | SNV             | R18C                   |
| GENIE-DFCI-111090   | GENIE-DFCI-111090-526543    | <i>MSH6</i> | SNV             | C783S                  |
| GENIE-MSK-P-0021894 | GENIE-MSK-P-0021894-T02-IM6 | <i>MSH2</i> | SNV             | E786Dfs*11             |
| GENIE-MSK-P-0024650 | GENIE-MSK-P-0024650-T01-IM6 | <i>MSH6</i> | SNV             | K247Nfs*32             |
| GENIE-MSK-P-0024686 | GENIE-MSK-P-0024686-T01-IM6 | <i>PMS2</i> | SNV             | Q449*                  |
| GENIE-MSK-P-0029087 | GENIE-MSK-P-0029087-T01-IM6 | <i>MSH6</i> | SNV             | R1076H                 |
| GENIE-MSK-P-0029248 | GENIE-MSK-P-0029248-T01-IM6 | <i>MSH6</i> | SNV             | F1088Sfs*2             |
| GENIE-MSK-P-0030831 | GENIE-MSK-P-0030831-T01-IM6 | <i>MSH6</i> | SNV             | K1288N                 |
| GENIE-DFCI-097596   | GENIE-DFCI-097596-757405    | <i>MSH2</i> | SNV             | A230Lfs*16             |
| GENIE-DFCI-097596   | GENIE-DFCI-097596-757405    | <i>MSH6</i> | SNV             | F1088Lfs*5             |
| GENIE-DFCI-097311   | GENIE-DFCI-097311-805372    | <i>MSH6</i> | SNV             | M492V                  |
| GENIE-MSK-P-0032701 | GENIE-MSK-P-0032701-T02-IM6 | <i>MSH2</i> | SNV             | V3Dfs*74               |
| GENIE-MSK-P-0036029 | GENIE-MSK-P-0036029-T02-IM7 | <i>MSH6</i> | SNV             | Q572*                  |
| GENIE-DFCI-142788   | GENIE-DFCI-142788-1358550   | <i>MSH6</i> | SNV             | F1088Lfs*5             |
| GENIE-DFCI-142788   | GENIE-DFCI-142788-1358550   | <i>PMS2</i> | SNV             | S46I                   |
| GENIE-DFCI-170500   | GENIE-DFCI-170500-1525865   | <i>MLH1</i> | SNV             | R389W                  |
| GENIE-MSK-P-0043336 | GENIE-MSK-P-0043336-T01-IM6 | <i>MSH2</i> | SNV             | Q324*                  |
| GENIE-MSK-P-0046590 | GENIE-MSK-P-0046590-T02-IM6 | <i>MSH2</i> | SNV             | K393Ffs*18             |
| GENIE-DFCI-153034   | GENIE-DFCI-153034-2271469   | <i>PMS2</i> | SNV             | R802*                  |

|                     |                             |                   |     |                         |
|---------------------|-----------------------------|-------------------|-----|-------------------------|
| GENIE-DFCI-173945   | GENIE-DFCI-173945-1903411   | <i>PMS2</i>       | SNV | Y310C                   |
| GENIE-DFCI-174496   | GENIE-DFCI-174496-2021516   | <i>PMS2</i>       | SNV | X330_splice             |
| GENIE-DFCI-186495   | GENIE-DFCI-186495-2904280   | <i>PMS2</i>       | SNV | T728Afs*7               |
| GENIE-DFCI-202219   | GENIE-DFCI-202219-2970119   | <i>MSH6</i>       | SNV | F1088Lfs*5              |
| GENIE-DFCI-256069   | GENIE-DFCI-256069-3646077   | <i>MLH1</i>       | SNV | X347_splice             |
| GENIE-MSK-P-0058939 | GENIE-MSK-P-0058939-T02-IM7 | <i>MSH6</i>       | SNV | R495*                   |
| GENIE-MSK-P-0063582 | GENIE-MSK-P-0063582-T01-IM7 | <i>MSH6</i>       | SNV | F1088Lfs*5, R1095H      |
| GENIE-MSK-P-0061912 | GENIE-MSK-P-0061912-T01-IM7 | <i>MSH6</i>       | SNV | V558M                   |
| GENIE-UCSF-13670    | GENIE-UCSF-13670-3171T      | <i>MSH6</i>       | SNV | F1037L                  |
| GENIE-UCSF-14714    | GENIE-UCSF-14714-1780T      | <i>MLH1</i>       | SNV | X102_splice             |
| GENIE-UCSF-14919    | GENIE-UCSF-14919-5905T      | <i>MSH6</i>       | SNV | X1334_splice            |
| GENIE-MSK-P-0012930 | GENIE-MSK-P-0012930-T01-IM5 | <i>MLH1</i>       | CNV | Homozygous deletion     |
| GENIE-MSK-P-0008667 | GENIE-MSK-P-0008667-T03-IM6 | <i>MLH1</i>       | CNV | Homozygous deletion     |
| GENIE-MSK-P-0001774 | GENIE-MSK-P-0001774-T01-IM3 | <i>MSH2</i>       | CNV | Homozygous deletion     |
| GENIE-MSK-P-0008682 | GENIE-MSK-P-0008682-T01-IM5 | <i>MSH2, MSH6</i> | CNV | Homozygous deletion     |
| GENIE-MSK-P-0012928 | GENIE-MSK-P-0012928-T01-IM5 | <i>MSH2, MSH6</i> | CNV | Homozygous deletion     |
| GENIE-MSK-P-0019023 | GENIE-MSK-P-0019023-T05-IM6 | <i>MSH2, MSH6</i> | CNV | Homozygous deletion     |
| GENIE-MSK-P-0019937 | GENIE-MSK-P-0019937-T01-IM6 | <i>MSH2, MSH6</i> | CNV | Homozygous deletion     |
| GENIE-MSK-P-0025952 | GENIE-MSK-P-0025952-T01-IM6 | <i>MSH2, MSH6</i> | CNV | Homozygous deletion     |
| GENIE-MSK-P-0027637 | GENIE-MSK-P-0027637-T02-IM6 | <i>MSH2, MSH6</i> | CNV | Homozygous deletion     |
| GENIE-MSK-P-0029248 | GENIE-MSK-P-0029248-T01-IM6 | <i>MSH2</i>       | CNV | Homozygous deletion     |
| GENIE-MSK-P-0050196 | GENIE-MSK-P-0050196-T01-IM6 | <i>MSH2, MSH6</i> | CNV | Homozygous deletion     |
| GENIE-DFCI-332769   | GENIE-DFCI-332769-3960475   | <i>MSH2</i>       | CNV | Homozygous deletion     |
| GENIE-MSK-P-0064150 | GENIE-MSK-P-0064150-T01-IM7 | <i>MSH2, MSH6</i> | CNV | Homozygous deletion     |
| GENIE-MSK-P-0058939 | GENIE-MSK-P-0058939-T02-IM7 | <i>MSH6</i>       | CNV | Homozygous deletion     |
| GENIE-MSK-P-0063582 | GENIE-MSK-P-0063582-T01-IM7 | <i>MSH6</i>       | CNV | Homozygous deletion     |
| GENIE-DFCI-238006   | GENIE-DFCI-238006-3307418   | <i>MLH1</i>       | SV  | <i>MLH1</i> -intragenic |
| GENIE-MSK-P-0014756 | GENIE-MSK-P-0014756-T01-IM6 | <i>MSH2</i>       | SV  | <i>MSH2</i> -intragenic |
| GENIE-DFCI-011525   | GENIE-DFCI-011525-11235     | <i>MSH2</i>       | SV  | <i>MSH2</i> -intergenic |
| GENIE-MSK-P-0058939 | GENIE-MSK-P-0058939-T02-IM7 | <i>MSH2</i>       | SV  | <i>MSH2</i> -intragenic |
| GENIE-MSK-P-0060952 | GENIE-MSK-P-0060952-T01-IM7 | <i>MSH2</i>       | SV  | <i>MSH2</i> -intragenic |
| GENIE-MSK-P-0062080 | GENIE-MSK-P-0062080-T01-IM7 | <i>MSH2</i>       | SV  | <i>MSH2</i> -intragenic |
| GENIE-MSK-P-0061330 | GENIE-MSK-P-0061330-T01-IM7 | <i>MSH6</i>       | SV  | <i>MSH6</i> -intragenic |
| GENIE-DFCI-417258   | GENIE-DFCI-417258-4381272   | <i>MSH6</i>       | SV  | <i>MSH6</i> -intragenic |

**Supplementary Table S4.** SNV frequency by MMR status in primary tumors

| Gene           | SNV No.<br>MMR-d | SNV Freq.<br>MMR-d | SNV No.<br>MMR-p | SNV Freq.<br>MMR-p | Nominal<br>P.Value | Significant |
|----------------|------------------|--------------------|------------------|--------------------|--------------------|-------------|
| <i>JAK1</i>    | 22               | 31.88              | 38               | 1.46               | 2.30E-21           | Yes         |
| <i>ASXL1</i>   | 20               | 28.99              | 27               | 1.04               | 5.62E-21           | Yes         |
| <i>KMT2D</i>   | 32               | 46.38              | 162              | 6.24               | 1.51E-19           | Yes         |
| <i>RNF43</i>   | 19               | 27.54              | 28               | 1.08               | 2.07E-19           | Yes         |
| <i>SMARCA4</i> | 17               | 24.64              | 18               | 0.69               | 4.22E-19           | Yes         |
| <i>NCOR1</i>   | 20               | 28.99              | 38               | 1.46               | 8.72E-19           | Yes         |
| <i>NF1</i>     | 19               | 27.54              | 33               | 1.27               | 2.06E-18           | Yes         |
| <i>POLD1</i>   | 15               | 21.74              | 14               | 0.54               | 1.89E-17           | Yes         |
| <i>SPEN</i>    | 19               | 27.54              | 50               | 1.93               | 9.15E-16           | Yes         |
| <i>KMT2A</i>   | 19               | 27.54              | 51               | 1.97               | 1.23E-15           | Yes         |
| <i>ZFHX3</i>   | 23               | 33.33              | 93               | 3.58               | 1.29E-15           | Yes         |
| <i>MSH3</i>    | 12               | 17.39              | 11               | 0.42               | 3.67E-14           | Yes         |
| <i>CIC</i>     | 14               | 20.29              | 23               | 0.89               | 5.98E-14           | Yes         |
| <i>FAT1</i>    | 18               | 26.09              | 58               | 2.24               | 1.09E-13           | Yes         |
| <i>POLE</i>    | 14               | 20.29              | 29               | 1.12               | 6.82E-13           | Yes         |
| <i>ATR</i>     | 11               | 15.94              | 23               | 0.89               | 2.78E-10           | Yes         |
| <i>KMT2C</i>   | 19               | 27.54              | 127              | 4.89               | 1.51E-09           | Yes         |
| <i>MGA</i>     | 14               | 20.29              | 70               | 2.70               | 1.23E-08           | Yes         |
| <i>PIK3CA</i>  | 14               | 20.29              | 77               | 2.97               | 3.59E-08           | Yes         |
| <i>ERBB4</i>   | 9                | 13.04              | 24               | 0.92               | 7.26E-08           | Yes         |
| <i>ERG</i>     | 7                | 10.14              | 10               | 0.39               | 9.11E-08           | Yes         |
| <i>CDK12</i>   | 15               | 21.74              | 100              | 3.85               | 1.08E-07           | Yes         |
| <i>ARID1B</i>  | 11               | 15.94              | 49               | 1.89               | 1.96E-07           | Yes         |
| <i>PTEN</i>    | 18               | 26.09              | 157              | 6.05               | 1.98E-07           | Yes         |
| <i>CREBBP</i>  | 10               | 14.49              | 44               | 1.70               | 6.77E-07           | Yes         |
| <i>ARID1A</i>  | 10               | 14.49              | 51               | 1.97               | 2.21E-06           | Yes         |
| <i>BRCA2</i>   | 13               | 18.84              | 102              | 3.93               | 4.60E-06           | Yes         |
| <i>RB1</i>     | 8                | 11.59              | 37               | 1.43               | 1.35E-05           | Yes         |
| <i>ATM</i>     | 13               | 18.84              | 115              | 4.43               | 1.53E-05           | Yes         |
| <i>BRIP1</i>   | 6                | 8.70               | 18               | 0.69               | 2.26E-05           | Yes         |
| <i>PMS1</i>    | 5                | 7.25               | 10               | 0.39               | 2.47E-05           | Yes         |
| <i>ETV1</i>    | 5                | 7.25               | 10               | 0.39               | 2.47E-05           | Yes         |
| <i>CHEK2</i>   | 5                | 7.25               | 13               | 0.50               | 6.65E-05           | Yes         |
| <i>NBN</i>     | 4                | 5.80               | 8                | 0.31               | 0.000174566        | Yes         |
| <i>IDH1</i>    | 5                | 7.25               | 18               | 0.69               | 0.000235947        | No          |
| <i>FANCA</i>   | 5                | 7.25               | 20               | 0.77               | 0.000357831        | No          |
| <i>AR</i>      | 5                | 7.25               | 22               | 0.85               | 0.000522255        | No          |
| <i>TMPRSS2</i> | 5                | 7.25               | 22               | 0.85               | 0.000522255        | No          |
| <i>PIK3R1</i>  | 5                | 7.25               | 25               | 0.96               | 0.000867893        | No          |

|               |    |       |     |       |             |    |
|---------------|----|-------|-----|-------|-------------|----|
| <i>MED12</i>  | 7  | 10.14 | 57  | 2.20  | 0.001104276 | No |
| <i>KDM6A</i>  | 8  | 11.59 | 86  | 3.31  | 0.002528629 | No |
| <i>PALB2</i>  | 4  | 5.80  | 21  | 0.81  | 0.003458218 | No |
| <i>FOXA1</i>  | 17 | 24.64 | 317 | 12.22 | 0.004825269 | No |
| <i>BRCA1</i>  | 4  | 5.80  | 24  | 0.92  | 0.005279455 | No |
| <i>APC</i>    | 9  | 13.04 | 128 | 4.93  | 0.007842192 | No |
| <i>MYC</i>    | 3  | 4.35  | 20  | 0.77  | 0.020324323 | No |
| <i>BRAF</i>   | 4  | 5.80  | 47  | 1.81  | 0.04131884  | No |
| <i>TP53</i>   | 22 | 31.88 | 555 | 21.39 | 0.052609143 | No |
| <i>CDKN1B</i> | 3  | 4.35  | 35  | 1.35  | 0.073645057 | No |
| <i>RAD51C</i> | 1  | 1.45  | 2   | 0.08  | 0.075735202 | No |
| <i>CTNNB1</i> | 4  | 5.80  | 61  | 2.35  | 0.08573971  | No |
| <i>EPCAM</i>  | 1  | 1.45  | 3   | 0.12  | 0.099701482 | No |
| <i>SPOP</i>   | 12 | 17.39 | 331 | 12.76 | 0.272157039 | No |
| <i>MUTYH</i>  | 1  | 1.45  | 12  | 0.46  | 0.289602119 | No |

**Supplementary Table S5. SNV frequency by MMR status in metastatic tumors**

| Gene           | SNV No.<br>MMR-d | SNV Freq.<br>MMR-d | SNV No.<br>MMR-p | SNV Freq.<br>MMR-p | Nominal<br>P.Value | Significant |
|----------------|------------------|--------------------|------------------|--------------------|--------------------|-------------|
| <i>JAK1</i>    | 17               | 28.33              | 34               | 2.52               | 2.39E-12           | Yes         |
| <i>ERBB4</i>   | 12               | 20.00              | 20               | 1.48               | 1.36E-09           | Yes         |
| <i>KMT2A</i>   | 12               | 20.00              | 28               | 2.08               | 2.59E-08           | Yes         |
| <i>KMT2D</i>   | 20               | 33.33              | 103              | 7.64               | 3.21E-08           | Yes         |
| <i>CIC</i>     | 11               | 18.33              | 24               | 1.78               | 6.21E-08           | Yes         |
| <i>FAT1</i>    | 13               | 21.67              | 44               | 3.26               | 2.35E-07           | Yes         |
| <i>SPEN</i>    | 11               | 18.33              | 30               | 2.22               | 3.86E-07           | Yes         |
| <i>RNF43</i>   | 10               | 16.67              | 24               | 1.78               | 5.42E-07           | Yes         |
| <i>CREBBP</i>  | 10               | 16.67              | 25               | 1.85               | 7.34E-07           | Yes         |
| <i>BRCA1</i>   | 8                | 13.33              | 13               | 0.96               | 8.91E-07           | Yes         |
| <i>SMARCA4</i> | 9                | 15.00              | 19               | 1.41               | 9.20E-07           | Yes         |
| <i>MGA</i>     | 12               | 20.00              | 49               | 3.63               | 4.05E-06           | Yes         |
| <i>POLE</i>    | 9                | 15.00              | 27               | 2.00               | 9.59E-06           | Yes         |
| <i>ERG</i>     | 5                | 8.33               | 5                | 0.37               | 2.54E-05           | Yes         |
| <i>ARID1B</i>  | 8                | 13.33              | 24               | 1.78               | 3.18E-05           | Yes         |
| <i>ASXL1</i>   | 10               | 16.67              | 44               | 3.26               | 5.07E-05           | Yes         |
| <i>AR</i>      | 16               | 26.67              | 129              | 9.56               | 0.000192646        | No          |
| <i>KMT2C</i>   | 12               | 20.00              | 76               | 5.63               | 0.000195135        | No          |
| <i>NBN</i>     | 5                | 8.33               | 10               | 0.74               | 0.000256266        | No          |
| <i>ETV1</i>    | 4                | 6.67               | 9                | 0.67               | 0.001594324        | No          |
| <i>APC</i>     | 14               | 23.33              | 128              | 9.49               | 0.001705111        | No          |
| <i>FANCA</i>   | 5                | 8.33               | 18               | 1.33               | 0.002205235        | No          |
| <i>BRCA2</i>   | 9                | 15.00              | 63               | 4.67               | 0.002576811        | No          |
| <i>NCOR1</i>   | 5                | 8.33               | 20               | 1.48               | 0.003260111        | No          |
| <i>ZFHX3</i>   | 9                | 15.00              | 66               | 4.89               | 0.003435638        | No          |
| <i>PMS1</i>    | 3                | 5.00               | 6                | 0.44               | 0.005137611        | No          |
| <i>ATR</i>     | 4                | 6.67               | 15               | 1.11               | 0.007129477        | No          |
| <i>ARID1A</i>  | 6                | 10.00              | 37               | 2.74               | 0.008235443        | No          |
| <i>MSH3</i>    | 3                | 5.00               | 8                | 0.59               | 0.009493499        | No          |
| <i>ATM</i>     | 9                | 15.00              | 88               | 6.52               | 0.018566625        | No          |
| <i>CHEK2</i>   | 3                | 5.00               | 11               | 0.82               | 0.01911636         | No          |
| <i>MYC</i>     | 3                | 5.00               | 11               | 0.82               | 0.01911636         | No          |
| <i>NF1</i>     | 4                | 6.67               | 24               | 1.78               | 0.028278698        | No          |
| <i>POLD1</i>   | 3                | 5.00               | 16               | 1.19               | 0.043755968        | No          |
| <i>MED12</i>   | 4                | 6.67               | 29               | 2.15               | 0.048259618        | No          |
| <i>PALB2</i>   | 3                | 5.00               | 18               | 1.33               | 0.056558955        | No          |
| <i>CDK12</i>   | 8                | 13.33              | 87               | 6.45               | 0.057687413        | No          |
| <i>PTEN</i>    | 10               | 16.67              | 120              | 8.90               | 0.062708181        | No          |
| <i>RBI</i>     | 6                | 10.00              | 62               | 4.60               | 0.064628669        | No          |



|                |    |       |     |       |             |    |
|----------------|----|-------|-----|-------|-------------|----|
| <i>BRIP1</i>   | 2  | 3.33  | 9   | 0.67  | 0.076610608 | No |
| <i>RAD51D</i>  | 1  | 1.67  | 1   | 0.07  | 0.083382396 | No |
| <i>BRAF</i>    | 3  | 5.00  | 25  | 1.85  | 0.11313236  | No |
| <i>PIK3R1</i>  | 4  | 6.67  | 40  | 2.97  | 0.113509245 | No |
| <i>TMPRSS2</i> | 2  | 3.33  | 14  | 1.04  | 0.146122942 | No |
| <i>EPCAM</i>   | 1  | 1.67  | 4   | 0.30  | 0.195793847 | No |
| <i>PIK3CA</i>  | 5  | 8.33  | 69  | 5.11  | 0.239627519 | No |
| <i>MUTYH</i>   | 1  | 1.67  | 6   | 0.44  | 0.263084156 | No |
| <i>RAD51C</i>  | 1  | 1.67  | 6   | 0.44  | 0.263084156 | No |
| <i>CDKN1B</i>  | 2  | 3.33  | 25  | 1.85  | 0.320668534 | No |
| <i>IDH1</i>    | 1  | 1.67  | 8   | 0.59  | 0.324830152 | No |
| <i>CTNNB1</i>  | 5  | 8.33  | 81  | 6.00  | 0.408347896 | No |
| <i>TP53</i>    | 20 | 33.33 | 503 | 37.29 | 0.586716003 | No |
| <i>KDM6A</i>   | 2  | 3.33  | 43  | 3.19  | 0.717235558 | No |
| <i>SPOP</i>    | 7  | 11.67 | 146 | 10.82 | 0.831428903 | No |
| <i>FOXA1</i>   | 8  | 13.33 | 171 | 12.68 | 0.843213187 | No |

**Supplementary Table S6. CNV frequency by MMR status in primary tumors**

**Homozygous Deletion**

| Gene           | CNV No.<br>MMR-d | CNV Freq.<br>MMR-d | CNV No.<br>MMR-p | CNV Freq.<br>MMR-p | Nominal<br>P.Value | Significant |
|----------------|------------------|--------------------|------------------|--------------------|--------------------|-------------|
| <i>EPCAM</i>   | 7                | 10.60606           | 0                | 0                  | 4.81E-12           | YES         |
| <i>EPAS1</i>   | 4                | 8                  | 1                | 0.047506           | 1.26E-06           | YES         |
| <i>ETV1</i>    | 2                | 3.030303           | 2                | 0.078647           | 0.00366            | NO          |
| <i>KMT2C</i>   | 2                | 3.921569           | 4                | 0.188058           | 0.007595           | NO          |
| <i>AGO2</i>    | 0                | 0                  | 1                | 0.047506           | 1                  | NO          |
| <i>ANKRD11</i> | 2                | 4                  | 30               | 1.425178           | 0.168836           | NO          |
| <i>APC</i>     | 0                | 0                  | 16               | 0.623782           | 1                  | NO          |
| <i>AR</i>      | 0                | 0                  | 0                | 0                  | 1                  | NO          |
| <i>ATM</i>     | 0                | 0                  | 10               | 0.389864           | 1                  | NO          |
| <i>ATR</i>     | 0                | 0                  | 2                | 0.077973           | 1                  | NO          |
| <i>BRAF</i>    | 0                | 0                  | 0                | 0                  | 1                  | NO          |
| <i>BRCA1</i>   | 0                | 0                  | 6                | 0.233918           | 1                  | NO          |
| <i>BRCA2</i>   | 0                | 0                  | 32               | 1.247563           | 1                  | NO          |
| <i>BRIP1</i>   | 0                | 0                  | 0                | 0                  | 1                  | NO          |
| <i>CDK12</i>   | 0                | 0                  | 2                | 0.077973           | 1                  | NO          |
| <i>CDKN1B</i>  | 1                | 1.492537           | 48               | 1.871345           | 1                  | NO          |
| <i>CHEK2</i>   | 0                | 0                  | 9                | 0.350877           | 1                  | NO          |
| <i>CTNNB1</i>  | 0                | 0                  | 1                | 0.038986           | 1                  | NO          |
| <i>CXCR4</i>   | 2                | 3.030303           | 36               | 1.415651           | 0.249617           | NO          |
| <i>CYSLTR2</i> | 2                | 4                  | 57               | 2.707838           | 0.400578           | NO          |
| <i>ERF</i>     | 0                | 0                  | 19               | 0.902613           | 1                  | NO          |
| <i>ERG</i>     | 1                | 1.492537           | 48               | 1.871345           | 1                  | NO          |
| <i>FANCA</i>   | 3                | 4.477612           | 30               | 1.169591           | 0.049944           | NO          |
| <i>FOXA1</i>   | 0                | 0                  | 1                | 0.039324           | 1                  | NO          |
| <i>FOXF1</i>   | 2                | 4                  | 23               | 1.092637           | 0.112893           | NO          |
| <i>FOXO1</i>   | 2                | 4                  | 43               | 2.042755           | 0.280698           | NO          |
| <i>HOXB13</i>  | 0                | 0                  | 0                | 0                  | 1                  | NO          |
| <i>IDH1</i>    | 0                | 0                  | 2                | 0.077973           | 1                  | NO          |
| <i>KMT2D</i>   | 0                | 0                  | 0                | 0                  | 1                  | NO          |
| <i>MED12</i>   | 0                | 0                  | 1                | 0.039324           | 1                  | NO          |
| <i>MSH3</i>    | 1                | 1.960784           | 12               | 0.564175           | 0.265739           | NO          |
| <i>MUTYH</i>   | 0                | 0                  | 2                | 0.077973           | 1                  | NO          |
| <i>MYC</i>     | 0                | 0                  | 2                | 0.077973           | 1                  | NO          |
| <i>NBN</i>     | 0                | 0                  | 2                | 0.077973           | 1                  | NO          |
| <i>NCOR1</i>   | 1                | 2                  | 2                | 0.095012           | 0.068034           | NO          |
| <i>PALB2</i>   | 0                | 0                  | 0                | 0                  | 1                  | NO          |
| <i>PIK3CA</i>  | 0                | 0                  | 5                | 0.194932           | 1                  | NO          |

|                |   |          |     |          |          |    |
|----------------|---|----------|-----|----------|----------|----|
| <i>PLCG2</i>   | 2 | 4        | 34  | 1.615202 | 0.202621 | NO |
| <i>PMS1</i>    | 0 | 0        | 0   | 0        | 1        | NO |
| <i>POLD1</i>   | 0 | 0        | 2   | 0.077973 | 1        | NO |
| <i>POLE</i>    | 0 | 0        | 8   | 0.311891 | 1        | NO |
| <i>PRDM14</i>  | 0 | 0        | 0   | 0        | 1        | NO |
| <i>PREX2</i>   | 0 | 0        | 0   | 0        | 1        | NO |
| <i>PTEN</i>    | 3 | 4.477612 | 211 | 8.226121 | 0.365469 | NO |
| <i>RAD51C</i>  | 0 | 0        | 4   | 0.157295 | 1        | NO |
| <i>RAD51D</i>  | 0 | 0        | 3   | 0.117971 | 1        | NO |
| <i>RB1</i>     | 2 | 2.985075 | 67  | 2.612086 | 0.694849 | NO |
| <i>RECQL4</i>  | 0 | 0        | 0   | 0        | 1        | NO |
| <i>RNF43</i>   | 0 | 0        | 8   | 0.311891 | 1        | NO |
| <i>SPOP</i>    | 0 | 0        | 1   | 0.038986 | 1        | NO |
| <i>TBX3</i>    | 0 | 0        | 5   | 0.235073 | 1        | NO |
| <i>TCEB1</i>   | 0 | 0        | 0   | 0        | 1        | NO |
| <i>TMPRSS2</i> | 1 | 1.515152 | 62  | 2.438065 | 1        | NO |
| <i>TP53</i>    | 1 | 1.492537 | 31  | 1.208577 | 0.563994 | NO |
| <i>ZFH3</i>    | 3 | 6        | 42  | 1.995249 | 0.084432 | NO |

**Supplementary Table S7. CNV frequency by MMR status in metastatic tumors**

**Homozygous Deletion**

| Gene           | CNV No.<br>MMR-d | CNV Freq.<br>MMR-d | CNV No.<br>MMR-p | CNV Freq.<br>MMR-p | Nominal<br>P.Value | Significant |
|----------------|------------------|--------------------|------------------|--------------------|--------------------|-------------|
| <i>EPCAM</i>   | 12               | 21.42857           | 0                | 0                  | 7.87E-18           | YES         |
| <i>EPAS1</i>   | 2                | 5.714286           | 1                | 0.094877           | 0.002952           | NO          |
| <i>INHA</i>    | 2                | 5.714286           | 3                | 0.28463            | 0.009447           | NO          |
| <i>AGO2</i>    | 0                | 0                  | 2                | 0.189753           | 1                  | NO          |
| <i>AMER1</i>   | 1                | 2.857143           | 2                | 0.189753           | 0.093436           | NO          |
| <i>ANKRD11</i> | 1                | 2.857143           | 37               | 3.510436           | 1                  | NO          |
| <i>APC</i>     | 0                | 0                  | 26               | 1.984733           | 0.622891           | NO          |
| <i>AR</i>      | 0                | 0                  | 1                | 0.076336           | 1                  | NO          |
| <i>ATM</i>     | 0                | 0                  | 7                | 0.534351           | 1                  | NO          |
| <i>ATR</i>     | 0                | 0                  | 0                | 0                  | 1                  | NO          |
| <i>BRAF</i>    | 0                | 0                  | 1                | 0.076336           | 1                  | NO          |
| <i>BRCA1</i>   | 0                | 0                  | 2                | 0.152672           | 1                  | NO          |
| <i>BRCA2</i>   | 1                | 1.754386           | 43               | 3.282443           | 1                  | NO          |
| <i>BRIP1</i>   | 0                | 0                  | 0                | 0                  | 1                  | NO          |
| <i>CDK12</i>   | 0                | 0                  | 1                | 0.076336           | 1                  | NO          |
| <i>CDKN1B</i>  | 1                | 1.754386           | 57               | 4.351145           | 0.510976           | NO          |
| <i>CHEK2</i>   | 0                | 0                  | 4                | 0.305344           | 1                  | NO          |
| <i>CTNNB1</i>  | 0                | 0                  | 0                | 0                  | 1                  | NO          |
| <i>ERF</i>     | 0                | 0                  | 10               | 0.948767           | 1                  | NO          |
| <i>ERG</i>     | 0                | 0                  | 1                | 0.076336           | 1                  | NO          |
| <i>ETV1</i>    | 0                | 0                  | 3                | 0.232378           | 1                  | NO          |
| <i>FANCA</i>   | 3                | 5.263158           | 40               | 3.053435           | 0.420695           | NO          |
| <i>FGF19</i>   | 0                | 0                  | 1                | 0.093197           | 1                  | NO          |
| <i>FGFR1</i>   | 1                | 1.754386           | 28               | 2.137405           | 1                  | NO          |
| <i>FOXA1</i>   | 0                | 0                  | 1                | 0.077459           | 1                  | NO          |
| <i>HOXB13</i>  | 0                | 0                  | 0                | 0                  | 1                  | NO          |
| <i>IDH1</i>    | 0                | 0                  | 0                | 0                  | 1                  | NO          |
| <i>KMT2C</i>   | 0                | 0                  | 4                | 0.372787           | 1                  | NO          |
| <i>KMT2D</i>   | 0                | 0                  | 1                | 0.077459           | 1                  | NO          |
| <i>MAP3K1</i>  | 2                | 3.508772           | 37               | 2.824427           | 0.675947           | NO          |
| <i>MED12</i>   | 0                | 0                  | 2                | 0.154919           | 1                  | NO          |
| <i>MSH3</i>    | 0                | 0                  | 6                | 0.55918            | 1                  | NO          |
| <i>MUTYH</i>   | 0                | 0                  | 1                | 0.076336           | 1                  | NO          |
| <i>MYC</i>     | 0                | 0                  | 0                | 0                  | 1                  | NO          |
| <i>NBN</i>     | 0                | 0                  | 0                | 0                  | 1                  | NO          |
| <i>NCOR1</i>   | 0                | 0                  | 8                | 0.759013           | 1                  | NO          |
| <i>PALB2</i>   | 0                | 0                  | 3                | 0.229008           | 1                  | NO          |

|                |   |          |     |          |          |    |
|----------------|---|----------|-----|----------|----------|----|
| <i>PIK3CA</i>  | 0 | 0        | 0   | 0        | 1        | NO |
| <i>PLK2</i>    | 1 | 2.857143 | 30  | 2.8463   | 1        | NO |
| <i>PMS1</i>    | 1 | 1.785714 | 2   | 0.154919 | 0.119693 | NO |
| <i>POLD1</i>   | 0 | 0        | 1   | 0.076336 | 1        | NO |
| <i>POLE</i>    | 0 | 0        | 5   | 0.381679 | 1        | NO |
| <i>PTEN</i>    | 7 | 12.2807  | 230 | 17.55725 | 0.373257 | NO |
| <i>RAD51C</i>  | 0 | 0        | 1   | 0.077459 | 1        | NO |
| <i>RAD51D</i>  | 0 | 0        | 0   | 0        | 1        | NO |
| <i>RB1</i>     | 1 | 1.754386 | 74  | 5.648855 | 0.365345 | NO |
| <i>RECQL4</i>  | 0 | 0        | 1   | 0.077459 | 1        | NO |
| <i>RNF43</i>   | 0 | 0        | 4   | 0.305344 | 1        | NO |
| <i>SPOP</i>    | 0 | 0        | 1   | 0.076336 | 1        | NO |
| <i>TCEB1</i>   | 0 | 0        | 0   | 0        | 1        | NO |
| <i>TMPRSS2</i> | 0 | 0        | 15  | 1.16189  | 1        | NO |
| <i>TP53</i>    | 2 | 3.508772 | 44  | 3.358779 | 0.717493 | NO |
| <i>ZFHX3</i>   | 1 | 2.857143 | 41  | 3.889943 | 1        | NO |

**Supplementary Table S8.** CNV frequency by MMR status in primary tumors

**High level of amplification**

| Gene           | CNV No.<br>MMR-d | CNV Freq.<br>MMR-d | CNV No.<br>MMR-p | CNV Freq.<br>MMR-p | Nominal<br>P.Value | Significant |
|----------------|------------------|--------------------|------------------|--------------------|--------------------|-------------|
| <i>BRAF</i>    | 1                | 1.492537           | 8                | 0.311891           | 0.207393           | NO          |
| <i>TBX3</i>    | 2                | 3.921569           | 42               | 1.974612           | 0.275518           | NO          |
| <i>AGO2</i>    | 2                | 4                  | 55               | 2.612827           | 0.383884           | NO          |
| <i>TPR52</i>   | 1                | 1.515152           | 21               | 0.825796           | 0.432211           | NO          |
| <i>RECQL4</i>  | 2                | 3.030303           | 67               | 2.634683           | 0.693319           | NO          |
| <i>ANKRD11</i> | 0                | 0                  | 1                | 0.047506           | 1                  | NO          |
| <i>APC</i>     | 0                | 0                  | 1                | 0.038986           | 1                  | NO          |
| <i>AR</i>      | 0                | 0                  | 34               | 1.325536           | 1                  | NO          |
| <i>ATM</i>     | 0                | 0                  | 3                | 0.116959           | 1                  | NO          |
| <i>ATR</i>     | 0                | 0                  | 10               | 0.389864           | 1                  | NO          |
| <i>BRCA1</i>   | 0                | 0                  | 3                | 0.116959           | 1                  | NO          |
| <i>BRCA2</i>   | 0                | 0                  | 2                | 0.077973           | 1                  | NO          |
| <i>BRIP1</i>   | 0                | 0                  | 8                | 0.311891           | 1                  | NO          |
| <i>CDK12</i>   | 0                | 0                  | 3                | 0.116959           | 1                  | NO          |
| <i>CDKN1B</i>  | 0                | 0                  | 6                | 0.233918           | 1                  | NO          |
| <i>CHEK2</i>   | 0                | 0                  | 1                | 0.038986           | 1                  | NO          |
| <i>CTNNB1</i>  | 0                | 0                  | 2                | 0.077973           | 1                  | NO          |
| <i>CXCR4</i>   | 0                | 0                  | 0                | 0                  | 1                  | NO          |
| <i>CYSLTR2</i> | 0                | 0                  | 0                | 0                  | 1                  | NO          |
| <i>EPAS1</i>   | 0                | 0                  | 2                | 0.095012           | 1                  | NO          |
| <i>EPCAM</i>   | 0                | 0                  | 1                | 0.039324           | 1                  | NO          |
| <i>ERF</i>     | 0                | 0                  | 0                | 0                  | 1                  | NO          |
| <i>ERG</i>     | 0                | 0                  | 1                | 0.038986           | 1                  | NO          |
| <i>ETV1</i>    | 0                | 0                  | 9                | 0.353913           | 1                  | NO          |
| <i>FANCA</i>   | 0                | 0                  | 1                | 0.038986           | 1                  | NO          |
| <i>FOXA1</i>   | 1                | 1.515152           | 57               | 2.241447           | 1                  | NO          |
| <i>FOXF1</i>   | 0                | 0                  | 0                | 0                  | 1                  | NO          |
| <i>FOXO1</i>   | 0                | 0                  | 0                | 0                  | 1                  | NO          |
| <i>HOXB13</i>  | 0                | 0                  | 19               | 0.747149           | 1                  | NO          |
| <i>IDH1</i>    | 0                | 0                  | 1                | 0.038986           | 1                  | NO          |
| <i>KMT2C</i>   | 0                | 0                  | 5                | 0.235073           | 1                  | NO          |
| <i>KMT2D</i>   | 0                | 0                  | 1                | 0.039324           | 1                  | NO          |
| <i>MED12</i>   | 0                | 0                  | 1                | 0.039324           | 1                  | NO          |
| <i>MSH3</i>    | 0                | 0                  | 1                | 0.047015           | 1                  | NO          |
| <i>MUTYH</i>   | 0                | 0                  | 0                | 0                  | 1                  | NO          |
| <i>MYC</i>     | 2                | 2.985075           | 95               | 3.703704           | 1                  | NO          |
| <i>NBN</i>     | 1                | 1.492537           | 65               | 2.534113           | 1                  | NO          |

|               |   |          |    |          |   |    |
|---------------|---|----------|----|----------|---|----|
| <i>NCOR1</i>  | 0 | 0        | 1  | 0.047506 | 1 | NO |
| <i>PALB2</i>  | 0 | 0        | 5  | 0.194932 | 1 | NO |
| <i>PIK3CA</i> | 0 | 0        | 16 | 0.623782 | 1 | NO |
| <i>PLCG2</i>  | 0 | 0        | 0  | 0        | 1 | NO |
| <i>PMS1</i>   | 0 | 0        | 0  | 0        | 1 | NO |
| <i>POLD1</i>  | 0 | 0        | 2  | 0.077973 | 1 | NO |
| <i>POLE</i>   | 0 | 0        | 2  | 0.077973 | 1 | NO |
| <i>PRDM14</i> | 1 | 2        | 69 | 3.27791  | 1 | NO |
| <i>PREX2</i>  | 1 | 1.960784 | 58 | 2.726845 | 1 | NO |
| <i>PTEN</i>   | 0 | 0        | 2  | 0.077973 | 1 | NO |
| <i>RAD51C</i> | 0 | 0        | 1  | 0.039324 | 1 | NO |
| <i>RAD51D</i> | 0 | 0        | 2  | 0.078647 | 1 | NO |
| <i>RB1</i>    | 0 | 0        | 0  | 0        | 1 | NO |
| <i>RNF43</i>  | 0 | 0        | 1  | 0.038986 | 1 | NO |
| <i>SPOP</i>   | 0 | 0        | 4  | 0.155945 | 1 | NO |
| <i>TCEB1</i>  | 1 | 2        | 73 | 3.467933 | 1 | NO |
| <i>TP53</i>   | 0 | 0        | 0  | 0        | 1 | NO |
| <i>ZFH3</i>   | 0 | 0        | 0  | 0        | 1 | NO |

**Supplementary Table S9.** CNV frequency by MMR status in metastatic tumors

**High level of amplification**

| Gene           | CNV No.<br>MMR-d | CNV Freq.<br>MMR-d | CNV No.<br>MMR-p | CNV Freq.<br>MMR-p | Nominal<br>P.Value | Significant |
|----------------|------------------|--------------------|------------------|--------------------|--------------------|-------------|
| <i>NBN</i>     | 0                | 0                  | 71               | 5.419847           | 0.069624           | NO          |
| <i>TCEB1</i>   | 0                | 0                  | 70               | 6.641366           | 0.162256           | NO          |
| <i>MYC</i>     | 3                | 5.263158           | 131              | 10                 | 0.359574           | NO          |
| <i>RECQL4</i>  | 1                | 1.785714           | 68               | 5.267235           | 0.359606           | NO          |
| <i>FOXA1</i>   | 0                | 0                  | 23               | 1.781565           | 0.620926           | NO          |
| <i>FGFR1</i>   | 0                | 0                  | 29               | 2.21374            | 0.62994            | NO          |
| <i>AR</i>      | 14               | 24.5614            | 365              | 27.8626            | 0.652452           | NO          |
| <i>AGO2</i>    | 2                | 5.714286           | 47               | 4.459203           | 0.668541           | NO          |
| <i>AMER1</i>   | 2                | 5.714286           | 64               | 6.072106           | 1                  | NO          |
| <i>ANKRD11</i> | 0                | 0                  | 0                | 0                  | 1                  | NO          |
| <i>APC</i>     | 0                | 0                  | 0                | 0                  | 1                  | NO          |
| <i>ATM</i>     | 0                | 0                  | 1                | 0.076336           | 1                  | NO          |
| <i>ATR</i>     | 0                | 0                  | 14               | 1.068702           | 1                  | NO          |
| <i>BRAF</i>    | 0                | 0                  | 5                | 0.381679           | 1                  | NO          |
| <i>BRCA1</i>   | 0                | 0                  | 2                | 0.152672           | 1                  | NO          |
| <i>BRCA2</i>   | 0                | 0                  | 2                | 0.152672           | 1                  | NO          |
| <i>BRIP1</i>   | 0                | 0                  | 6                | 0.458015           | 1                  | NO          |
| <i>CDK12</i>   | 0                | 0                  | 2                | 0.152672           | 1                  | NO          |
| <i>CDKN1B</i>  | 0                | 0                  | 1                | 0.076336           | 1                  | NO          |
| <i>CHEK2</i>   | 0                | 0                  | 0                | 0                  | 1                  | NO          |
| <i>CTNNB1</i>  | 0                | 0                  | 1                | 0.076336           | 1                  | NO          |
| <i>EPAS1</i>   | 0                | 0                  | 0                | 0                  | 1                  | NO          |
| <i>EPCAM</i>   | 0                | 0                  | 0                | 0                  | 1                  | NO          |
| <i>ERF</i>     | 0                | 0                  | 0                | 0                  | 1                  | NO          |
| <i>ERG</i>     | 0                | 0                  | 3                | 0.229008           | 1                  | NO          |
| <i>ETV1</i>    | 0                | 0                  | 7                | 0.542215           | 1                  | NO          |
| <i>FANCA</i>   | 0                | 0                  | 0                | 0                  | 1                  | NO          |
| <i>FGF19</i>   | 1                | 2.777778           | 30               | 2.795899           | 1                  | NO          |
| <i>HOXB13</i>  | 0                | 0                  | 13               | 1.006971           | 1                  | NO          |
| <i>IDH1</i>    | 0                | 0                  | 0                | 0                  | 1                  | NO          |
| <i>INHA</i>    | 0                | 0                  | 1                | 0.094877           | 1                  | NO          |
| <i>KMT2C</i>   | 0                | 0                  | 2                | 0.186393           | 1                  | NO          |
| <i>KMT2D</i>   | 0                | 0                  | 0                | 0                  | 1                  | NO          |
| <i>MAP3K1</i>  | 0                | 0                  | 0                | 0                  | 1                  | NO          |
| <i>MED12</i>   | 0                | 0                  | 20               | 1.549187           | 1                  | NO          |
| <i>MSH3</i>    | 0                | 0                  | 0                | 0                  | 1                  | NO          |
| <i>MUTYH</i>   | 0                | 0                  | 1                | 0.076336           | 1                  | NO          |



|                |   |   |   |          |   |    |
|----------------|---|---|---|----------|---|----|
| <i>NCOR1</i>   | 0 | 0 | 2 | 0.189753 | 1 | NO |
| <i>PALB2</i>   | 0 | 0 | 3 | 0.229008 | 1 | NO |
| <i>PIK3CA</i>  | 0 | 0 | 3 | 0.229008 | 1 | NO |
| <i>PLK2</i>    | 0 | 0 | 1 | 0.094877 | 1 | NO |
| <i>PMS1</i>    | 0 | 0 | 2 | 0.154919 | 1 | NO |
| <i>POLD1</i>   | 0 | 0 | 0 | 0        | 1 | NO |
| <i>POLE</i>    | 0 | 0 | 0 | 0        | 1 | NO |
| <i>PTEN</i>    | 0 | 0 | 0 | 0        | 1 | NO |
| <i>RAD51C</i>  | 0 | 0 | 5 | 0.387297 | 1 | NO |
| <i>RAD51D</i>  | 0 | 0 | 1 | 0.077459 | 1 | NO |
| <i>RB1</i>     | 0 | 0 | 0 | 0        | 1 | NO |
| <i>RNF43</i>   | 0 | 0 | 4 | 0.305344 | 1 | NO |
| <i>SPOP</i>    | 0 | 0 | 1 | 0.076336 | 1 | NO |
| <i>TMPRSS2</i> | 0 | 0 | 3 | 0.232378 | 1 | NO |
| <i>TP53</i>    | 0 | 0 | 0 | 0        | 1 | NO |
| <i>ZFHX3</i>   | 0 | 0 | 0 | 0        | 1 | NO |
