# Supplementary material for: The Somatic Mutational Landscape of Mismatch Repair Deficient Prostate Cancer
Source: J Clin Med. 2023 Jan 12;12(2):623. doi: 10.3390/jcm12020623 (PMC9864094; doi:10.3390/jcm12020623)
Supplement: Supplementary file 1 [file jcm-12-00623-s001.zip › Supplementary Table S1.xlsx]

## Sheet: Sheet1
Hereditary Cancer Genes	MMR Associated Genes	Commonly Altered Prostate Cancer Genes	Additional Top Genes for Primary Tumor SNV Analysis	Additional Top Genes for Metastasis Tumor SNV Analysis	Additional Top Genes for primary tumor CNV analysis	Additional Top Genes for metastasis tumor CNV analysis	Candidate Gene Genlist for Primary Tumor SNV Analysis	Candidate Gene Genlist for Metastasis Tumor SNV Analysis	Candidate Gene Genlist for Primary Tumor CNV Analysis	Candidate Gene Genlist for Metastasis Tumor CNV Analysis
ATM	APC	AR	KDM6A	MGA	EPAS1	AMER1	ATM	ATM	AR	AR
ATR	MLH3	BRAF	MGA	FAT1	CYSLTR2	AGO2	ATR	ATR	BRAF	BRAF
BRCA1	MSH3	CDK12	FAT1	ASXL1	AGO2	RECQL4	BRCA1	BRCA1	CDK12	CDK12
BRCA2	MUTYH	CDKN1B	KMT2A	JAK1	TBX3	TCEB1	BRCA2	BRCA2	CDKN1B	CDKN1B
BRIP1	PMS1	CHD1	SPEN	KDM6A	FOXO1	ANKRD11	BRIP1	BRIP1	CTNNB1	CTNNB1
CHEK2	POLD1	CTNNB1			RECQL4	MAP3K1	CHEK2	CHEK2	ERG	ERG
EPCAM	POLE	DNAPK			PLCG2	FGFR1	EPCAM	EPCAM	ETV1	ETV1
FANCA		ERF			ANKRD11	INHA	FANCA	FANCA	FOXA1	FOXA1
HOXB13		ERG			TCEB1	EPAS1	HOXB13	HOXB13	IDH1	IDH1
NBN		ETV1			PRDM14	PLK2	NBN	NBN	KMT2C	KMT2C
PALB2		ETV4			FOXF1	FGF19	PALB2	PALB2	KMT2D	KMT2D
RAD51C		FOXA1			PREX2		RAD51C	RAD51C	MED12	MED12
RAD51D		IDH1			CXCR4		RAD51D	RAD51D	MYC	MYC
TP53		KMT2C					TP53	TP53	NCOR1	NCOR1
		KMT2D					APC	APC	PIK3CA	PIK3CA
		MED12					MSH3	MSH3	PTEN	PTEN
		MYC					MUTYH	MUTYH	RB1	RB1
		NCOR1					PMS1	PMS1	RNF43	RNF43
		NCOR2					POLD1	POLD1	SPOP	SPOP
		PIK3CA					POLE	POLE	TMPRSS2	TMPRSS2
		PTEN					AR	AR	ZFHX3	ZFHX3
		RB1					BRAF	BRAF	APC	APC
		RNF43					CDK12	CDK12	MLH3	MLH3
		SPOP					CDKN1B	CDKN1B	MSH3	MSH3
		TMPRSS2					CTNNB1	CTNNB1	MUTYH	MUTYH
		ZFHX3					ERG	ERG	PMS1	PMS1
		ZMYM3					ETV1	ETV1	POLD1	POLD1
							FOXA1	FOXA1	POLE	POLE
							IDH1	IDH1	ATM	ATM
							KMT2C	KMT2C	ATR	ATR
							KMT2D	KMT2D	BRCA1	BRCA1
							MED12	MED12	BRCA2	BRCA2
							MYC	MYC	BRIP1	BRIP1
							NCOR1	NCOR1	CHEK2	CHEK2
							PIK3CA	PIK3CA	EPCAM	EPCAM
							PTEN	PTEN	FANCA	FANCA
							RB1	RB1	HOXB13	HOXB13
							RNF43	RNF43	NBN	NBN
							SPOP	SPOP	PALB2	PALB2
							TMPRSS2	TMPRSS2	RAD51C	RAD51C
							ZFHX3	ZFHX3	RAD51D	RAD51D
							KDM6A	MGA	TP53	TP53
							MGA	FAT1	EPAS1	AMER1
							FAT1	ASXL1	CYSLTR2	AGO2
							KMT2A	JAK1	AGO2	RECQL4
							SPEN	KDM6A	TBX3	TCEB1
									FOXO1	ANKRD11
									RECQL4	MAP3K1
									PLCG2	FGFR1
									ANKRD11	INHA
									TCEB1	EPAS1
									PRDM14	PLK2
									FOXF1	FGF19
									PREX2
									CXCR4
